# Supplementary material for: Modulation of miR-146b Expression during Aging and the Impact of Physical Activity on Its Expression and Chondrogenic Progenitors
Source: MDPI journal article supplement (doi:10.3390/ijms241713163), 2023-08-24
Supplement: s1 [file s1]

# Thermo fisher

BenchMark Pre-stained Protein Ladder  
Cat. no. 10748-010

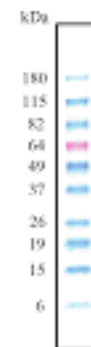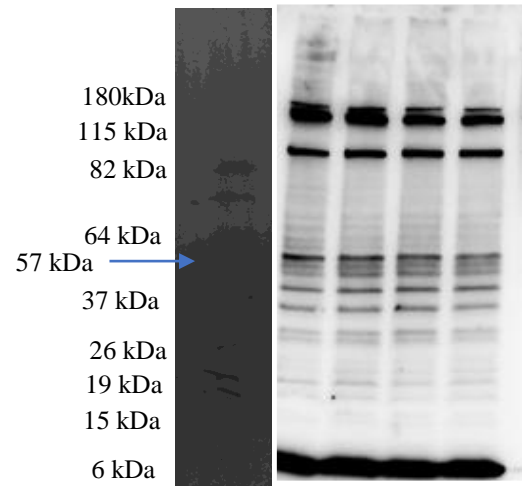

Figure 4C SESN 1 (57kd) lane 2, 3 and 4

180kDa  
115 kDa  
82 kDa  
64 kDa  
49 kDa  
37 kDa  
26 kDa  
19 kDa  
15 kDa  
6 kDa

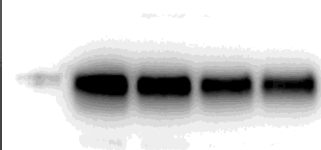

Figure 4C SESN 2 lane 2, 3 and 4

180kDa  
115 kDa  
82 kDa  
64 kDa  
49 kDa  
37 kDa  
26 kDa  
19 kDa  
15 kDa  
6 kDa

Figure 4C B actin lane 2, 3 and 4

NeoPRO 10 Prestained Protein Ladder NB-59-0002

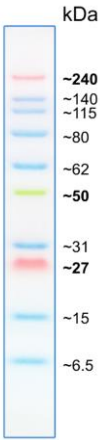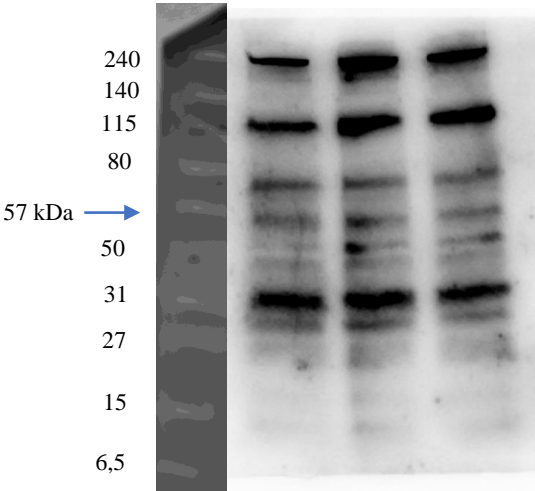

Figure 5B SESN1 lane 2 and 3

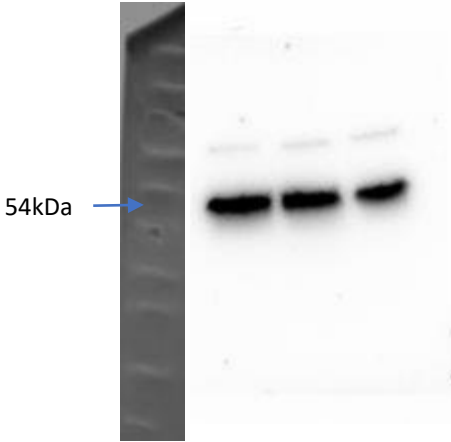

Figure 5B SESN2 lane 2 and 3

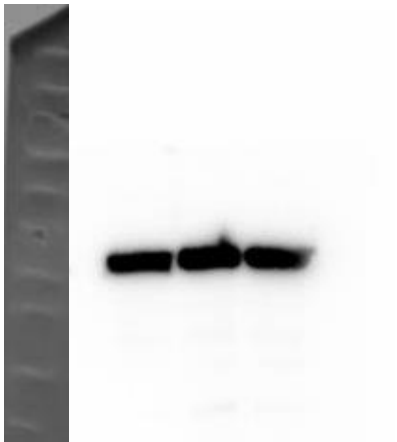

Figure 5B actin lane 1 and 2

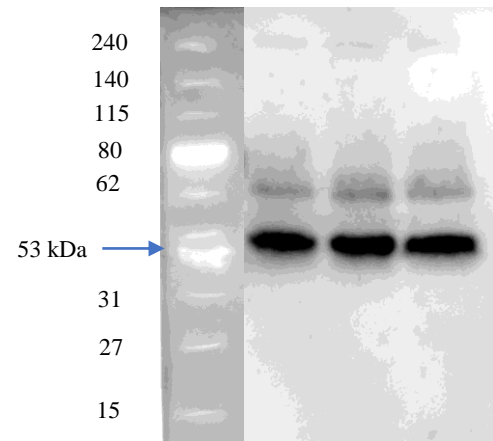

Figure 7A P53 lane 2 and 3

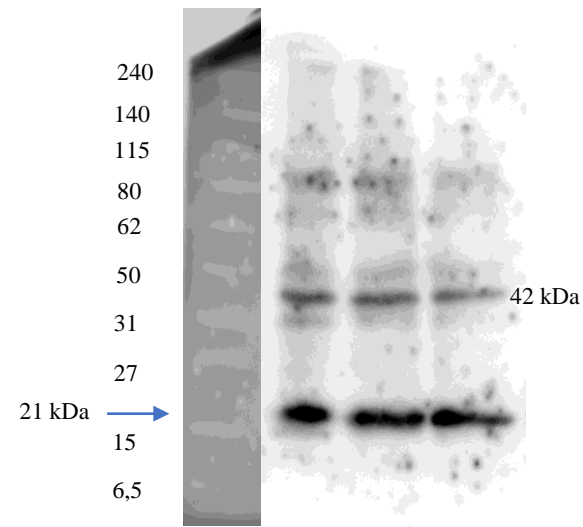

Figure 7A p21 lane 2 and 3

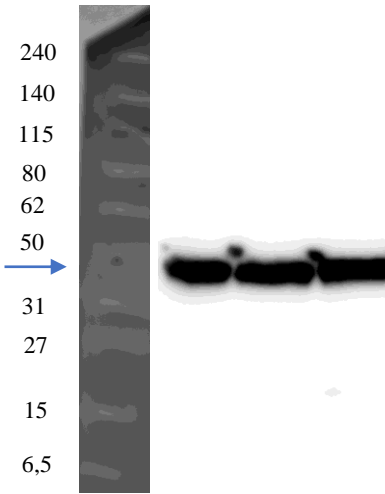

Figure 7A B actin lane 2 and 3

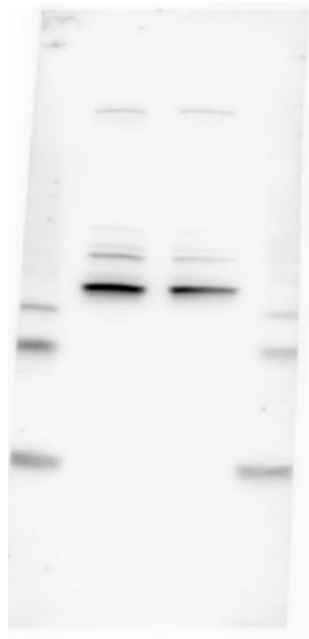

Figure 7B P53 lane 2 and 3

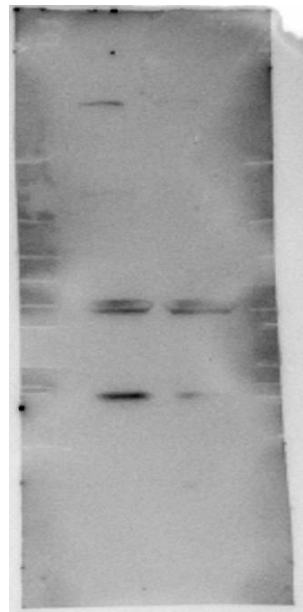

Figure 7B p21 lane 2 and 3

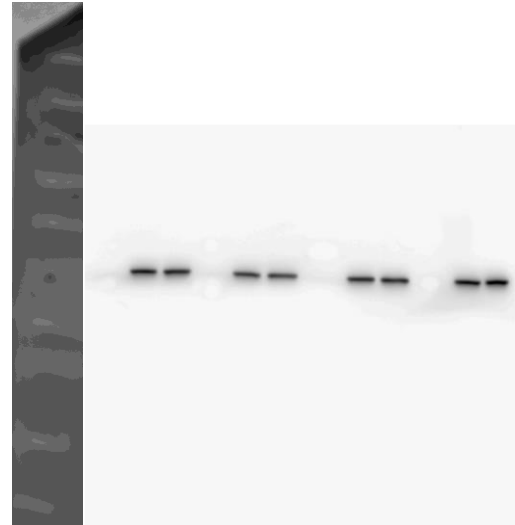

Figure 7C B actin lane 4 and 5

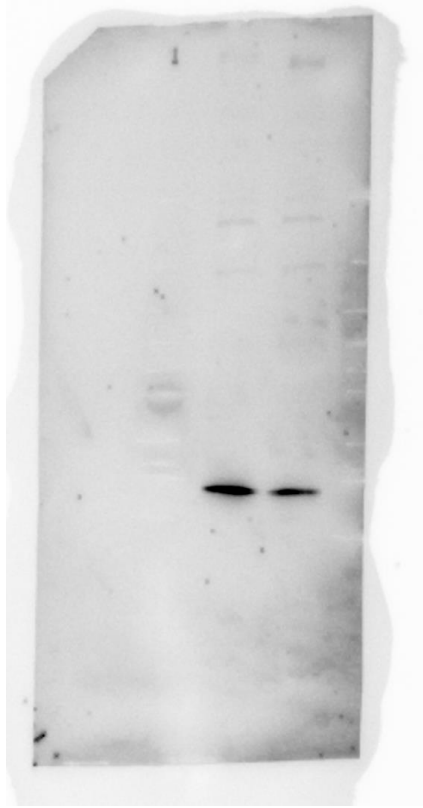

Figure 7C MMP13 lane 2 and 3

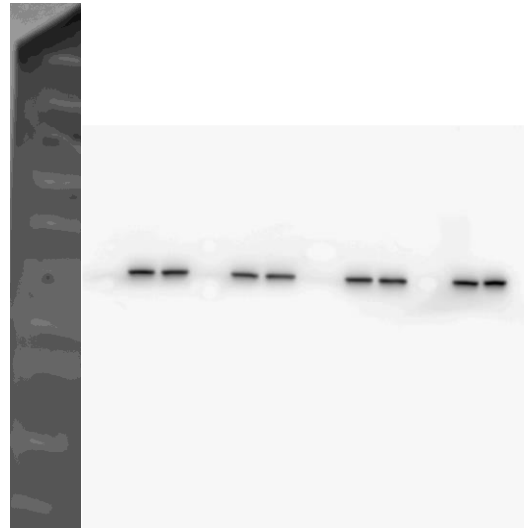

Figure 7C B actin lane 2 and 3
